# Supplementary material for: MicroRNA dysregulation in myelodysplastic syndromes: implications for diagnosis, prognosis, and therapeutic response
Source: PubMed Central journal article supplement (PMC11327013; doi:10.3389/fonc.2024.1410656), 2024-08-02
Supplement: DataSheet_1.pdf [file DataSheet_1.pdf]

Supplementary Table 1: Summary of microRNAs with implication in MDS.

| MicroRNA | Sample source          | Karyotype association | Expression    | Function                                                 | Target                                              | Implication                      | Reference        |
|----------|------------------------|-----------------------|---------------|----------------------------------------------------------|-----------------------------------------------------|----------------------------------|------------------|
| MiR-16   | Bone marrow            |                       | Upregulated   | Tumor suppressor                                         | VEGF                                                | Prognosis                        | [13]             |
| MiR-22   | Bone marrow/<br>Plasma |                       | Upregulated   | Role in HSC renewal                                      | TET2                                                | Prognosis/<br>Therapeutic target | [19]             |
| MiR-34a  | Peripheral blood       |                       | Upregulated   | Regulator of proliferation                               | DOCK8, FGD4, Rac1, c-Fos, Cdc42-WASP-Arp2/3 pathway | Potential therapeutic target     | [38], [39], [40] |
| MiR-146b | Bone marrow            |                       | Upregulated   | Role in tumorigenesis, erythropoiesis, megakaryopoiesis  | TRAF6, IRAK1, PDGFRA                                | Diagnostic and prognostic marker | [45], [46]       |
| MiR-150  | Bone marrow            | MDS with del(5q)      | Upregulated   | Role in erythropoiesis, megakaryopoiesis                 | MYB, BC200                                          | Potential therapeutic target     | [25]             |
| MiR-181  | Bone marrow            |                       | Upregulated   | Regulator of granulocytic and macrophage differentiation | PRKCD, CTDSPL, CAMKK1                               | Prognostic marker                | [7], [28], [29]  |
| MiR-320  | Bone marrow            |                       | Upregulated   |                                                          |                                                     | Diagnostic and prognostic marker | [35],[36]        |
| MiR-424  | Bone marrow            |                       | Downregulated | Regulator of monocyte                                    | VEGFR2                                              | Diagnostic marker,               | [45], [50], [52] |

|                                  |                     |                            |               |                                                                       |                          |                                                 |      |
|----------------------------------|---------------------|----------------------------|---------------|-----------------------------------------------------------------------|--------------------------|-------------------------------------------------|------|
|                                  |                     |                            |               | and macrophage differentiation                                        |                          | therapy response marker                         |      |
| MiR-765                          | Bone marrow         |                            | Upregulated   | Apoptosis                                                             | PLP2                     | Potential therapeutic target                    | [33] |
| MiRs in DLK1-DIO3 genomic region | Bone marrow         |                            | Upregulated   | Apoptosis, regulation of HSPC differentiation                         | MEG3-DMR                 | Prognostic markers, Therapy response markers    | [64] |
| MiR-125b                         | Bone marrow         | t(2;11)(p21; q23)          | Upregulated   | Block the myelomonocytic differentiation                              |                          | Potential therapeutic target                    | [65] |
| MiR-194                          | Bone marrow         | Trisomy 1                  | Upregulated   | Apoptosis                                                             | p53                      | Prognostic marker                               | [36] |
| MiR-218                          |                     |                            | Downregulated | Role in tumorigenesis                                                 | SLIT2/3                  | Prognostic marker, Potential therapeutic target | [60] |
| MiR-595                          | Bone marrow         | Chromosome 7 abnormalities | Downregulated | Cellular proliferation, apoptosis, and defective ribosomal biogenesis | RPL27A                   | Potential therapeutic target                    | [68] |
| MiR-597                          |                     |                            | Upregulated   | Apoptosis                                                             | FOSL2                    | Potential therapeutic target                    | [58] |
| MiR-192                          | Bone marrow /plasma |                            | Upregulated   | Tumor suppressor                                                      | BCL2, TP53, and TGF-beta | Therapy response                                | [88] |
| MiR-126                          | Bone marrow         |                            | Downregulated |                                                                       | DNMT1                    | Azacitidine resistance                          | [95] |

|                                                                                                              |             |                  |               |  |              |                                   |                  |
|--------------------------------------------------------------------------------------------------------------|-------------|------------------|---------------|--|--------------|-----------------------------------|------------------|
| MiR-4755                                                                                                     |             |                  | Upregulated   |  | CDKN2B       | Decitabine resistance             | [97]             |
| MiR-92a                                                                                                      | Exosomes    |                  | Upregulated   |  | PTEN         | Ara-C resistance                  | [98]             |
| MiR-21                                                                                                       | Bone marrow |                  | Upregulated   |  | SMAD7, TGF-b | Therapeutic target                | [107]            |
| MiR-146a                                                                                                     |             |                  |               |  | TRAF6, IRAK1 | Therapeutic target                | [108]            |
| miR-449a, miR-300, miR-210, miR-874, miR-589, miR-451 miR-223, miR-128b, miR-342                             | Bone marrow | MDS with del(5q) | Downregulated |  |              | Diagnostic markers                | [70], [72]       |
| miR-196b, miR-451, miR-98, miR-34a, miR-10a miR-10b, miR-126, miR-99b miR-130a, miR-199a, miR-125a, miR-125b | Bone marrow | MDS with del(5q) | Upregulated   |  |              | Diagnostic markers                | [70], [72]       |
| miR-206, miR-34b, miR-503, miR-651, miR-655, miR-150                                                         | Plasma      |                  | Upregulated   |  |              | Diagnostic and prognostic markers | [69], [77]       |
| miR-16, miR-let-7a, miR-144, miR-25, miR-451, miR-493, miR-92a, miR-96,                                      | Plasma      |                  | Downregulated |  |              | Diagnostic and prognostic markers | [69], [76], [77] |

|                                                                                                                                       |          |  |                   |  |  |                                            |            |
|---------------------------------------------------------------------------------------------------------------------------------------|----------|--|-------------------|--|--|--------------------------------------------|------------|
| miR-27a,<br>miR-199a,                                                                                                                 |          |  |                   |  |  |                                            |            |
| miR-103a,<br>miR-103b,<br>miR-107,<br>miR-221,<br>miR-221,<br>miR-130b,<br>miR-378i,<br>miR-3200,<br>miR-423,<br>miR-1193,<br>miR-143 | Exosomes |  | Upregulated       |  |  | Diagnostic<br>and<br>prognostic<br>markers | [79], [81] |
| miR-426,<br>miR-19b,<br>miR-1180,<br>miR-126,<br>miR-382                                                                              | Exosomes |  | Downregulate<br>d |  |  | Diagnostic<br>and<br>prognostic<br>markers | [81]       |
